# Supplementary material for: Vitamin D Status and Its Associated Risk Factors among Adults in the Southwest Region of Cameroon
Source: Hindawi journal article supplement (doi:10.1155/2018/4742574), 2018-01-01
Supplement: f1 [file 4742574.f1.pdf]

## RESEARCH QUESTIONNAIRE

### TITLE: VITAMIN D STATUS AND ITS ASSOCIATED RISK FACTORS AMONG ADULTS IN THE SOUTHWEST REGION OF CAMEROON

Name: \_\_\_\_\_ Tel. No. \_\_\_\_\_ Code number: \_\_\_\_\_

Gender: Male  Female  Age (years): \_\_\_\_\_ Religion: \_\_\_\_\_ Ethnic origin: \_\_\_\_\_

#### SOCIOECONOMIC STATUS

Educational level: .....|\_|

[1) Nil 2) Primary 3) Secondary 4) Tertiary (Highest degree \_\_\_\_\_)]

Employment status: .....|\_|

a) [ 1) Unemployed 2) Employed]

b) Profession: \_\_\_\_\_

Monthly Income (Francs CFA): .....|\_|

[1) <100000 2) 100000 – 200000 3) > 200000 ]

Residence:

1) Own a house: [1) Yes 2) No] .....|\_|

2) Renting: [1) Yes 2) No].....|\_|

Do you own a car? [1) Yes 2) No] .....|\_|

Marital status: [1) Unmarried 2) Married 3) Divorced 4) Widowed].....|\_|

If married is spouse employed? [1) Yes 2) No].....|\_|

Num of Children: \_\_\_\_\_

#### LIFESTYLE ACTIVITIES

a) How many hours do you spend spent outdoors per day.....|\_|

1) <1hour 2) < 3 hours 3) 3-6 hours 4) 6-10 hours

b) What percentage of your body is covered by dressing per day.....|\_|

1) > 80% 2) 60 – 80% 3) < 60%

c) Do you use sunscreen body lotions or creams? .....|\_|

1) Yes 2) No

#### SMOKING STATUS

Do you smoke cigarettes? .....|\_|

[1) No 2) Occasional 3) Yes]

If yes, number of sticks per day: .....|\_|

[1) < 5 2) 5 – 10 3) 10 – 20 4) > 20]

Number of smoking years

*Thanks for your cooperation*
